## Correction: Adipocytes secreted leptin is a pro-tumor factor for survival of multiple myeloma under chemotherapy

Wen Yu<sup>2,\*</sup>, De-Dong Cao<sup>3,\*</sup>, Qiu-bai Li<sup>1,4</sup>, Hui-ling Mei<sup>1</sup>, Yu Hu<sup>1,4</sup> and Tao Guo<sup>1,4</sup>

<sup>1</sup>Department of Hematology, Union Hospital, Tongji Medical College, Huazhong University of Science and Technology, Wuhan, Hubei, China

<sup>2</sup>Department of Pediatrics, Tongji Hospital, Tongji Medical College, Huazhong University of Science and Technology, Wuhan, China

<sup>3</sup>Department of Oncology, Remmin Hospital of Wuhan University, Wuhan, Hubei, China

<sup>4</sup>Collaborative Innovation Center of Hematology, Huazhong University of Science and Technology, Wuhan, Hubei, China

\*These authors contributed equally to this work

**Published:** September 22, 2023

**Copyright:** © 2023 Yu et al. This is an open access article distributed under the terms of the [Creative Commons Attribution License](#) (CC BY 3.0), which permits unrestricted use, distribution, and reproduction in any medium, provided the original author and source are credited.

**This article has been corrected:** In Figure 5B, the western blots for bcl-2, caspase 3 and  $\beta$ -actin are accidental duplicates of those in Figure 5C. In addition, in Figure 6, the same Y-axis scale has now been applied for both Figure 6A and 6B, in order to better show the proliferation differences between the two cells. The corrected Figures 5 and 6, produced using the original data, are shown below. The authors declare that these corrections do not change the results or conclusions of this paper.

Original article: Oncotarget. 2016; 7:86075–86086. <https://doi.org/10.18632/oncotarget.13342>

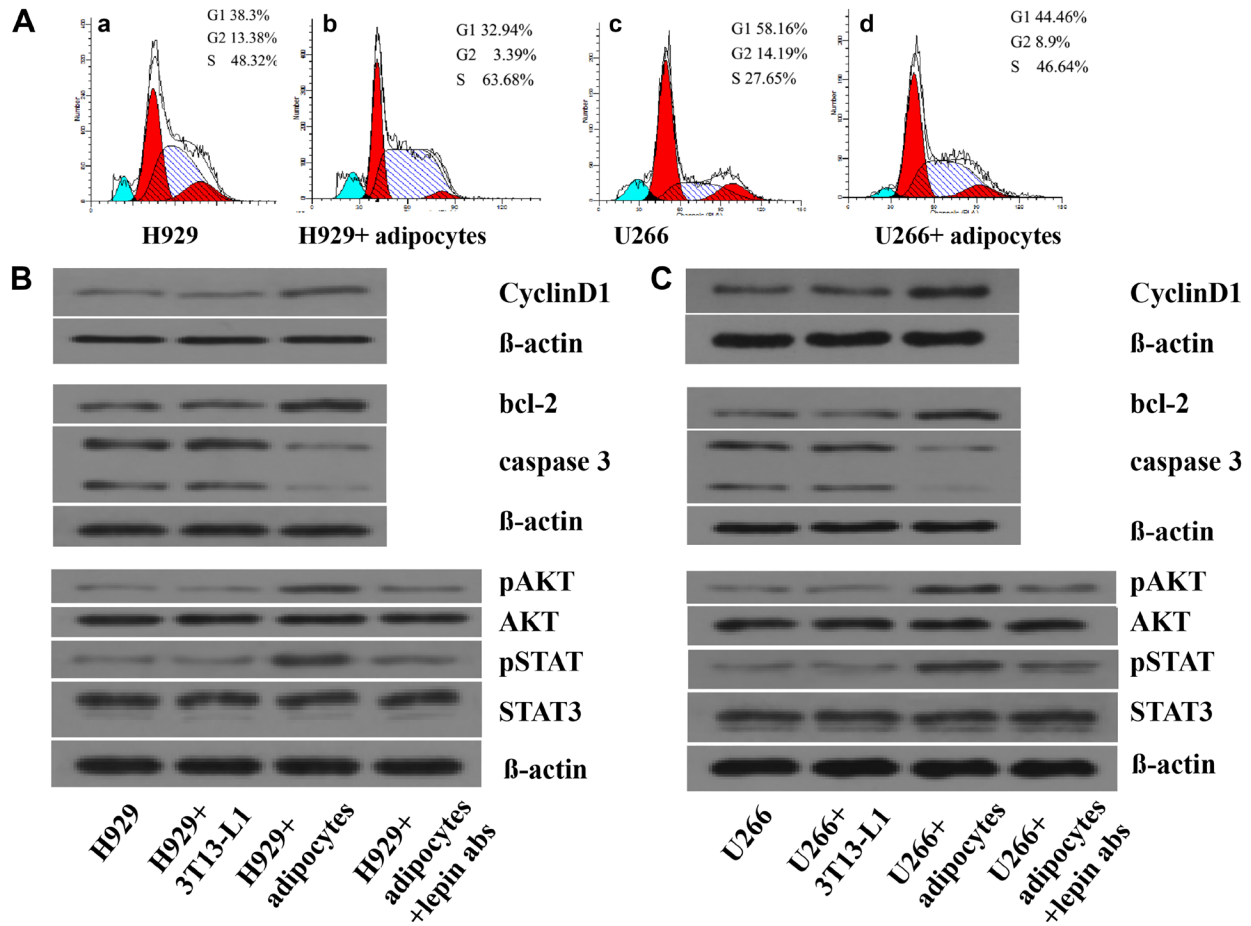

**Figure 5: Adipocytes influence the cell cycle and protein expressions in MM cells.** The percentages of MM cells in different phases of cell cycle are measured by Flow cytometry. In Figure 5A-a and 5A-c, the MM cells are served as controls. In Figure 5A-b and 5A-d, the MM cells are co-cultured with adipocytes. The percentages of cells in S phase are increased in 5A-b and 5A-d. Next, the expression of proteins including CyclinD1, bcl-2, caspase 3, pAKT, AKT, pSTAT, STAT3, and beta-actin are detected by Western blotting. (A) percentages of cells in S phase increased in co-culture system; (B) levels of proliferation associated proteins up-regulated in H929 cells; (C) levels of proliferation or apoptosis associated proteins up-regulated in U266 cells. When adding leptin antibodies to the co-culture system, the levels of proliferation associated proteins decreased.

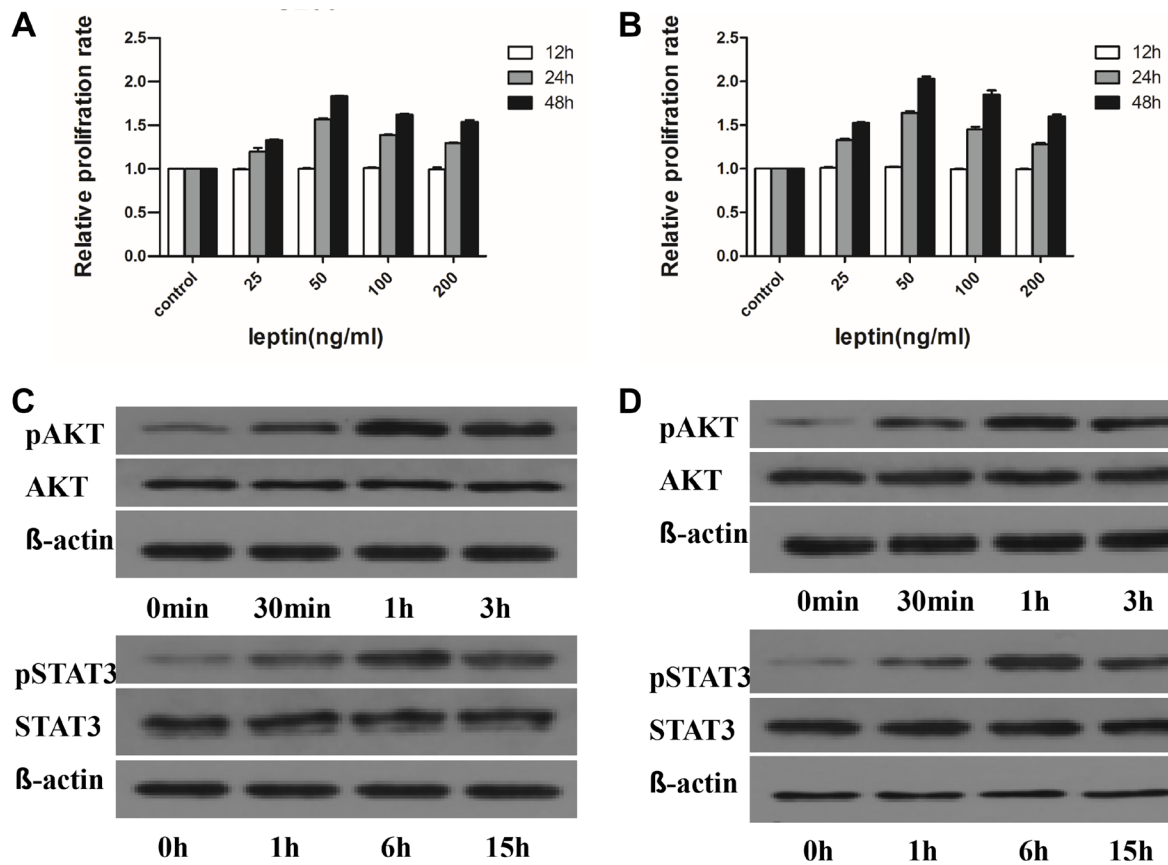

**Figure 6: Leptin promotes MM cells proliferation by regulating phosphorylation of proliferation associated proteins.** The proliferation of MM cells is dependent on dose but not time. The most significant increase in proliferation is observed at 50 ng/ml of leptin. This dose of leptin is used for the following experiments. (A) proliferation rates of H929 at different times with various concentrations of leptin; (B) proliferation rates of U266 at different times with varied concentrations of leptin; (C) levels of phosphorylated AKT and STAT3 at different time points in H929 cells treated with 50 ng/ml leptin; (D) levels of phosphorylated AKT and STAT3 at different time points in U266 cells treated with 50 ng/ml leptin).
